# Supplementary material
Source: PubMed Central journal article supplement (PMC5587397)
Supplement: NIHMS893277-supplement-1.pdf [file NIHMS893277-supplement-1.pdf]

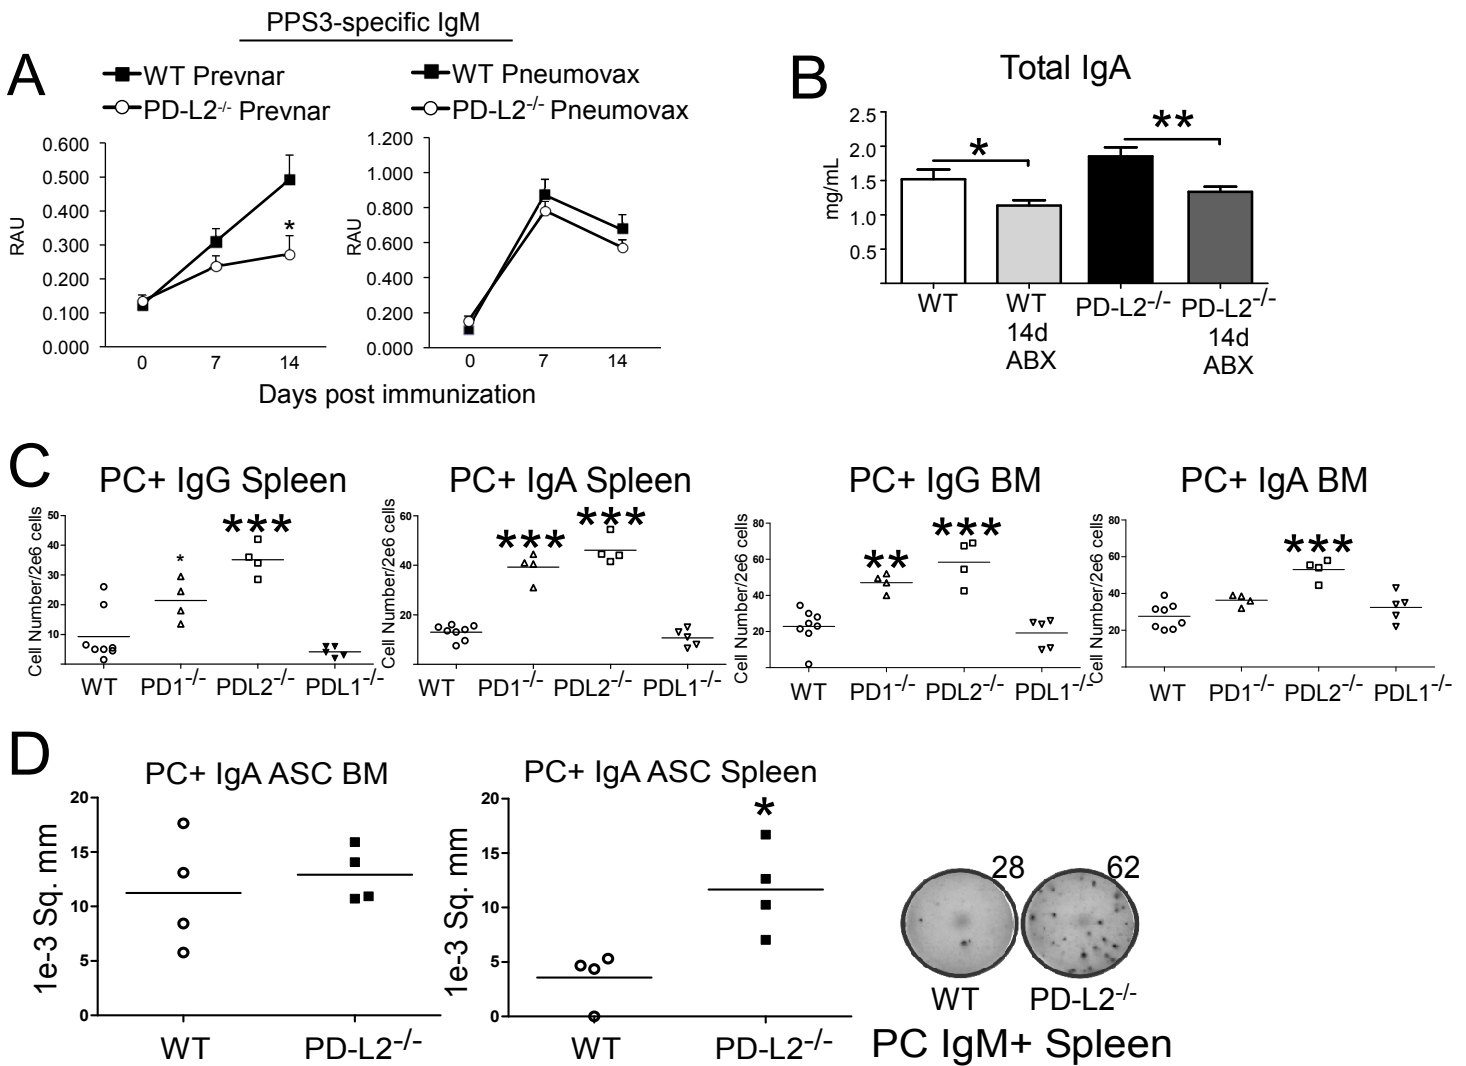

**Supplemental Figure 1. PD-L2 regulates Ab production.**

A) PPS-3-specific IgM levels in WT and PD-L2<sup>-/-</sup> mice following immunization with Pevnar-13 or Pneumovax (1  $\mu$ g PPS equivalent i.p.). Serum samples were pre-blocked using 10  $\mu$ g/ml cell wall polysaccharide prior to performing PPS3-specific ELISAs. B) Total serum IgA in WT and PD-L2<sup>-/-</sup> mice on ABX therapy. C) ELISPOT analysis of PC-specific IgG<sup>+</sup> and IgA<sup>+</sup> ASC spots in WT, PD-1<sup>-/-</sup>, PD-L2<sup>-/-</sup>, and PDL1<sup>-/-</sup> mouse BM and spleen. D) ELISPOT analysis of PC-specific IgA<sup>+</sup> ASC spot size in the BM and spleen (LEFT); representative image of PC-specific IgM<sup>+</sup> ELISPOT from spleen (RIGHT; quantitative data in Fig. 3A, C). A, B and D analyzed by Student's t test; C analyzed by ANOVA with Dunnett Post Test (\*p<0.05, \*\* p<0.01, \*\*\* p<0.001).

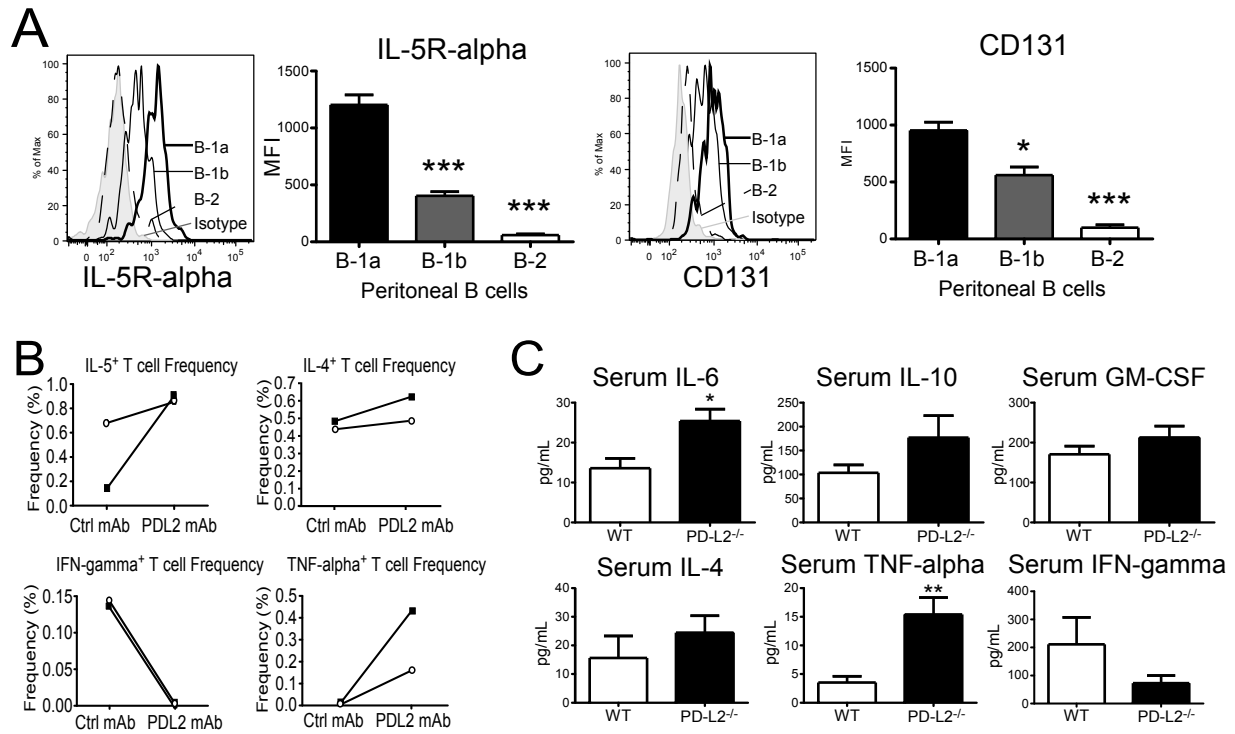

**Supplemental Figure 2. PD-L2 regulates cytokine production.**

A) IL-5Ra and CD131 expression amongst peritoneal B cell subsets. A representative histogram for IL-5Ra and CD131 and mean (MFI) expression levels are shown. B) Frequency of IL-4+, IL-5+, TNF-alpha+, and IFN-gamma+ T cells among T cells in 2-day cultures of munt splenocyte-WT PerC B-1 cells treated with PDL2 or control mAb; data from two independent experiments. C) Serum IL-4, IL-6, IL-10, GM-CSF, IFN-gamma, and TNF-alpha levels in naive WT and PD-L2<sup>-/-</sup> mice (n=4 mice/group). A, C analyzed by Student's t test; (\*p<0.05, \*\* p<0.01, \*\*\* p<0.001).
